# Supplementary material for: Encapsulation of monoamine neurotransmitters and trace amines by amphiphilic anionic calix[5]arene micelles
Source: Royal Society of Chemistry journal article supplement (doi:10.1039/c4nj01184h), 2014-09-18
Supplement: c4nj01184h1.pdf [file c4nj01184h1.pdf]

# New Journal of Chemistry

---

## Encapsulation of monoamine neurotransmitters and trace amines by amphiphilic anionic calix[5]arene micelles

Giuseppe Gattuso,<sup>a</sup> Anna Notti,<sup>\*a</sup> Sebastiano Pappalardo,<sup>b</sup> Melchiorre F. Parisi,<sup>\*a</sup> Ilenia Pisagatti<sup>a</sup> and Salvatore Patanè<sup>c</sup>

<sup>a</sup>Dipartimento di Scienze Chimiche, Università di Messina, Viale F. Stagno d'Alcontres 31, 98166 Messina, Italy

<sup>b</sup>Dipartimento di Scienze Chimiche, Università di Catania, Viale A. Doria 6, 95125 Catania, Italy

<sup>c</sup>Dipartimento di Fisica e di Scienze della Terra, Viale F. Stagno d'Alcontres 31, 98166 Messina, Italy

### Electronic Supplementary Information

---

| page | Contents                                                                                                                                                                                                                                              |
|------|-------------------------------------------------------------------------------------------------------------------------------------------------------------------------------------------------------------------------------------------------------|
| S2   | <b>Table S1.</b> Diffusion coefficients of calixarene <b>1</b> at different concentrations.                                                                                                                                                           |
| S3   | <b>Table S2.</b> <sup>1</sup> H NMR data of guests <b>2–7</b> prior and after binding to <b>1</b> .                                                                                                                                                   |
| S4   | <b>Figure S1.</b> Plot of the diffusion coefficients of the calixarene-Pea·HCl surfactant vs 1/[ <b>1</b> ] = [ <b>2</b> ].                                                                                                                           |
| S5   | <b>Figure S2.</b> <sup>1</sup> H NMR spectra of: (a) [ <b>1</b> ] = 10 mM, (b) [ <b>1</b> ] = [ <b>2</b> ] = 10 mM and (c) [ <b>2</b> ] = 10 mM. (d) The 2D NOESY spectrum of [ <b>1</b> ] = [ <b>2</b> ] = 10 mM                                     |
| S6   | <b>Figure S3.</b> <sup>1</sup> H NMR spectra of: (a) [ <b>1</b> ] = 10 mM, (b) [ <b>1</b> ] = [ <b>3</b> ] = 10 mM and (c) [ <b>3</b> ] = 10 mM. (d) The 2D NOESY spectrum of [ <b>1</b> ] = [ <b>3</b> ] = 10 mM.                                    |
| S7   | <b>Figure S4.</b> <sup>1</sup> H NMR spectra of: (a) [ <b>1</b> ] = 10 mM, (b) [ <b>1</b> ] = [ <b>4</b> ] = 10 mM and (c) [ <b>4</b> ] = 10 mM. (d) The 2D NOESY spectrum of [ <b>1</b> ] = [ <b>4</b> ] = 10 mM.                                    |
| S8   | <b>Figure S5.</b> <sup>1</sup> H NMR spectra of: (a) [ <b>1</b> ] = 10 mM, (b) [ <b>1</b> ] = [ <b>5</b> ] = 10 mM and (c) [ <b>5</b> ] = 10 mM. (d) The 2D NOESY spectrum (500 MHz, 298 K, D <sub>2</sub> O) of [ <b>1</b> ] = [ <b>5</b> ] = 10 mM. |
| S9   | <b>Figure S6.</b> <sup>1</sup> H NMR spectra of: (a) [ <b>1</b> ] = 10 mM, (b) [ <b>1</b> ] = [ <b>6</b> ] = 10 mM and (c) [ <b>6</b> ] = 10 mM. (d) The 2D NOESY spectrum of [ <b>1</b> ] = [ <b>6</b> ] = 10 mM.                                    |
| S10  | <b>Figure S7.</b> <sup>1</sup> H NMR spectra of: (a) [ <b>1</b> ] = 10 mM, (b) [ <b>1</b> ] = [ <b>7</b> ] = 10 mM and (c) [ <b>7</b> ] = 10 mM. (d) The 2D NOESY spectrum of [ <b>1</b> ] = [ <b>7</b> ] = 10 mM.                                    |

**Table S1.** Diffusion coefficients ( $D_{\text{free}}$ ), hydrodynamic radii ( $R_h$ ) and aggregation numbers ( $N$ ) of the species present at 298 K in  $D_2O$  solutions of calixarene **1** at different concentrations. Data were calculated from DOSY experiments, using the  $SCH_2$  resonance ( $\delta = 2.87$  ppm) as the probe signal.

| $C$ (mM) | $D_{\text{free}} \times 10^{-10}$ ( $m^2/s$ ) | $R_h$ ( $\text{\AA}$ ) | $N$  |
|----------|-----------------------------------------------|------------------------|------|
| 10       | $0.82 \pm 0.03$                               | $24.4 \pm 0.9$         | 14.3 |
| 7.5      | $0.82 \pm 0.05$                               | $24.4 \pm 1.4$         | 14.3 |
| 5        | $0.94 \pm 0.08$                               | $21.2 \pm 1.6$         | 9.5  |
| 2        | $1.17 \pm 0.10$                               | $17.0 \pm 1.3$         | 4.9  |
| 1        | $1.62 \pm 0.10$                               | $12.3 \pm 0.7$         | 1.8  |
| 0.8      | $1.78 \pm 0.08$                               | $11.2 \pm 0.5$         | 1.4  |
| 0.64     | $1.89 \pm 0.05$                               | $10.5 \pm 0.2$         | 1.2  |
| 0.5      | $1.94 \pm 0.07$                               | $10.3 \pm 0.4$         | 1.1  |
| 0.4      | $1.98 \pm 0.07$                               | $10.1 \pm 0.4$         | 1    |
| 0.3      | $2.04 \pm 0.10$                               | $9.8 \pm 0.5$          | 0.9  |
| 0.2      | $1.99 \pm 0.08$                               | $10.0 \pm 0.5$         | 1    |

**Table S2.** Chemical shifts (ppm) of neurotransmitters **2–7** (10 mM) prior and after binding to calixarene **1** (10 mM) and relative complexation induced shifts (cis). <sup>1</sup>H NMR spectra were recorded in D<sub>2</sub>O (500 MHz, 298 K).<sup>a</sup>

| Proton                    | $\delta$ (ppm) | $\delta_{\text{bound}}$ (ppm) | cis ( $\Delta\delta$ , ppm) |
|---------------------------|----------------|-------------------------------|-----------------------------|
| <b>Pea·HCl (2)</b>        |                |                               |                             |
| $\alpha$ -CH <sub>2</sub> | 3.16           | 3.01<br>(-0.62)               | 0.15<br>(3.78)              |
| $\beta$ -CH <sub>2</sub>  | 2.88           | 2.74<br>(-0.81)               | 0.14<br>(3.69)              |
| ArH(2,6)                  | 7.21           | 6.91<br>(4.75)                | 0.30<br>(2.46)              |
| ArH(4)                    | 7.23           | 6.76<br>(6.54)                | 0.47<br>(0.69)              |
| ArH(3,5)                  | 7.30           | 7.02<br>(6.29)                | 0.28<br>(1.01)              |
| <b>Tyrm·HCl (3)</b>       |                |                               |                             |
| $\alpha$ -CH <sub>2</sub> | 3.10           | 2.94                          | 0.16                        |
| $\beta$ -CH <sub>2</sub>  | 2.79           | 2.57                          | 0.22                        |
| ArH(3,5)                  | 7.08           | 6.86                          | 0.22                        |
| ArH(2,6)                  | 6.77           | 6.61                          | 0.16                        |
| <b>Dopa·HCl (4)</b>       |                |                               |                             |
| $\alpha$ -CH <sub>2</sub> | 3.10           | 2.94                          | 0.16                        |
| $\beta$ -CH <sub>2</sub>  | 2.75           | 2.51                          | 0.24                        |
| ArH(6)                    | 6.78           | 6.62                          | 0.16                        |
| ArH(3)                    | 6.71           | 6.61                          | 0.10                        |
| ArH(5)                    | 6.63           | 6.38                          | 0.25                        |
| <b>Sert·HCl (5)</b>       |                |                               |                             |
| $\alpha$ -CH <sub>2</sub> | 3.18           | 3.03                          | 0.15                        |
| $\beta$ -CH <sub>2</sub>  | 2.98           | 2.76                          | 0.22                        |
| ArH(7)                    | 7.29           | 6.96                          | 0.33                        |
| ArH(2)                    | 7.15           | 6.95                          | 0.20                        |
| ArH(4)                    | 6.96           | 6.83                          | 0.13                        |
| ArH(6)                    | 6.74           | 6.54                          | 0.20                        |
| <b>Hist·2HCl (6)</b>      |                |                               |                             |
| $\alpha$ -CH <sub>2</sub> | 3.22           | 3.14                          | 0.08                        |
| $\beta$ -CH <sub>2</sub>  | 3.03           | 2.88                          | 0.15                        |
| ArH(2)                    | 8.51           | 8.37                          | 0.19                        |
| ArH(4)                    | 7.26           | 7.14                          | 0.12                        |
| <b>Nore·HCl (7)</b>       |                |                               |                             |
| CH <sub>2</sub> N         | 3.10           | 2.94                          | 0.16                        |
| CHO                       | 4.75           | 4.65                          | 0.10                        |
| ArH(6)                    | 6.82           | 6.67                          | 0.15                        |
| ArH(3)                    | 6.83           | 6.77                          | 0.06                        |
| ArH(5)                    | 6.74           | 6.58                          | 0.16                        |

<sup>a</sup> Values in parenthesis refer to the chemical shifts of the *endo*-cavity included phenethylammonium ions (Pea·H<sup>+</sup>Cl).

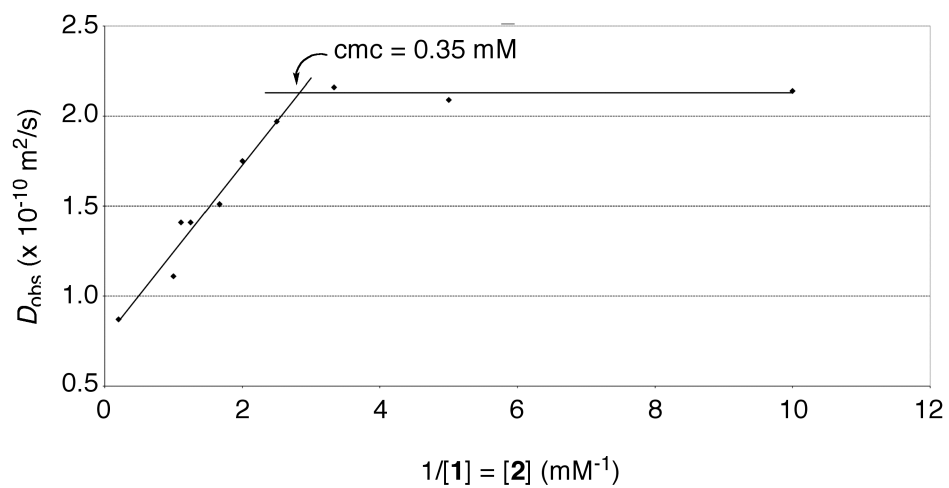

**Figure S1.** Plot of the diffusion coefficients ( $D_{\text{obs}}$ ) of the calixarene-Pea·HCl surfactant vs  $1/[\mathbf{1}] = [\mathbf{2}]$ . Data were calculated using the isochronous ArCH<sub>2</sub>Ar resonances ( $\delta$  4.35 ppm) of the monomers and the aggregated species.

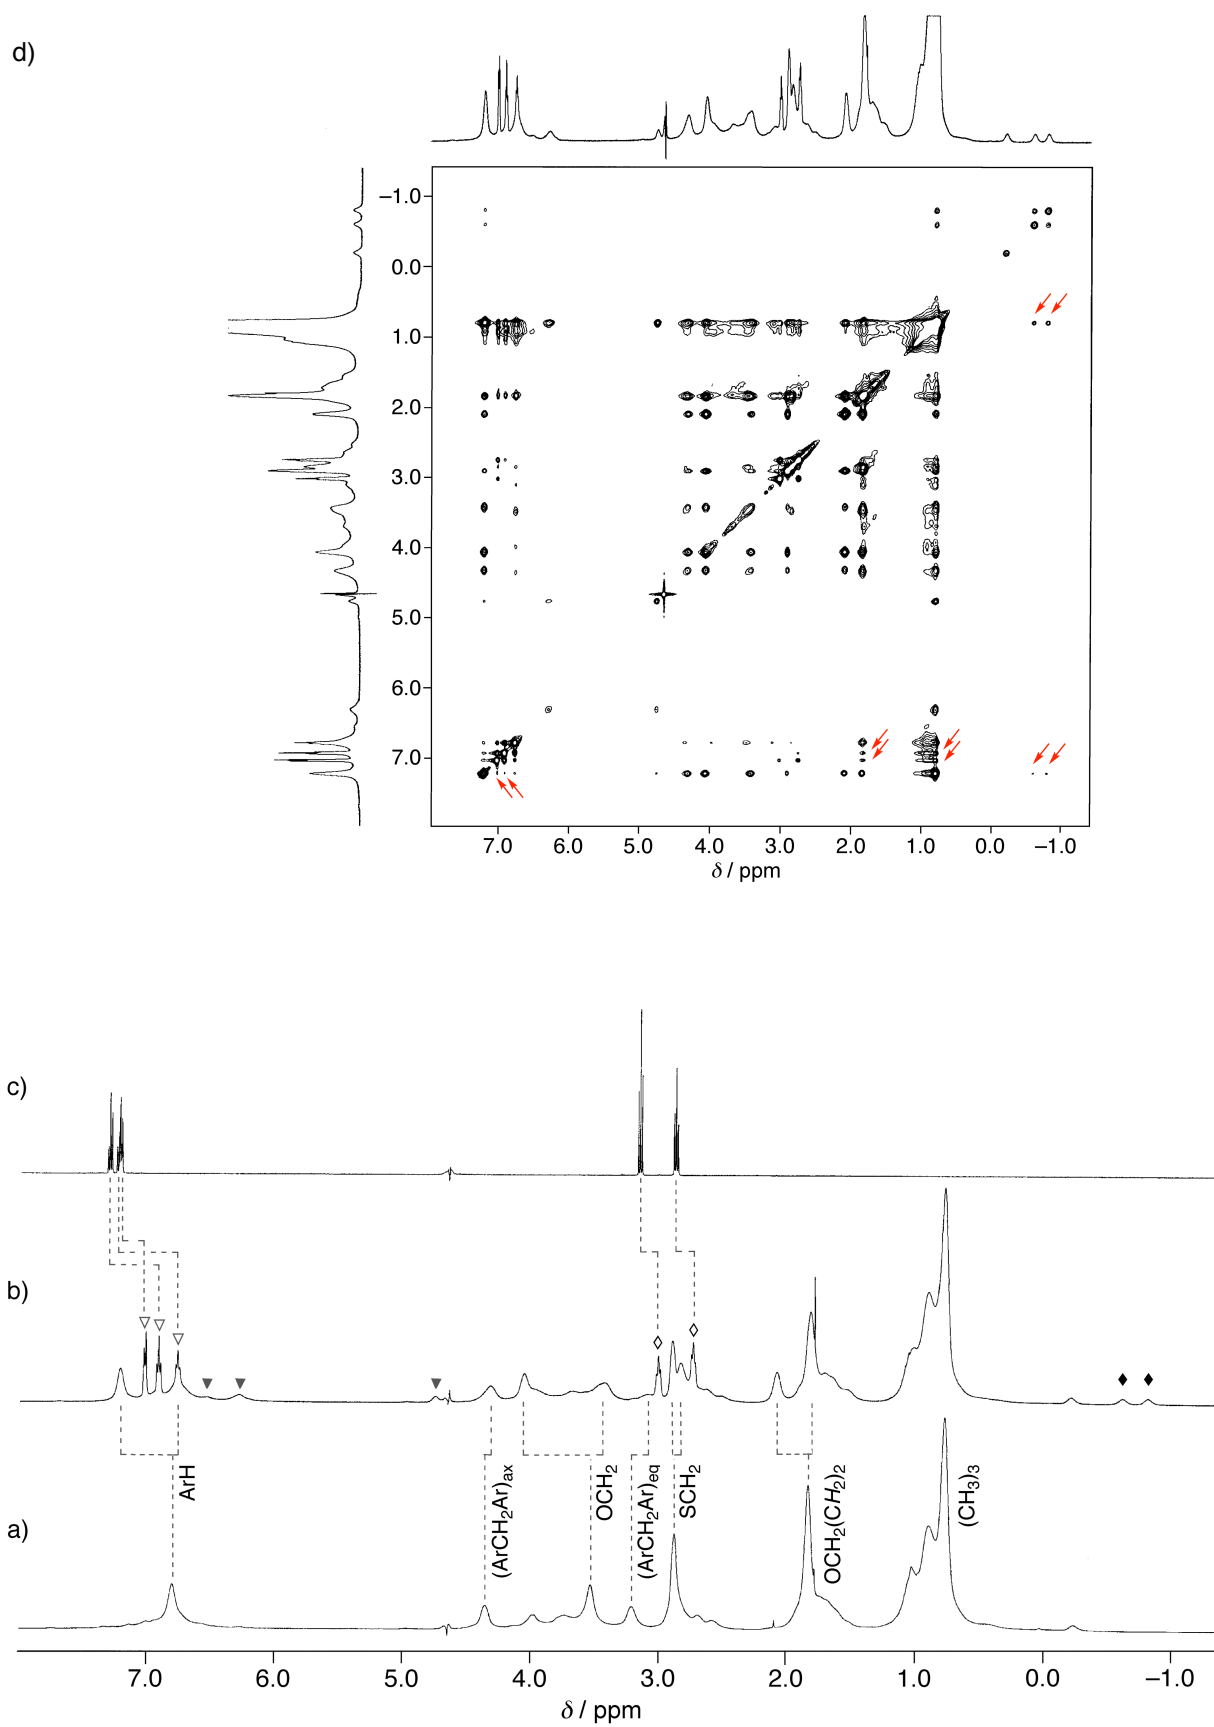

**Figure S2.**  $^1\text{H}$  NMR spectra (500 MHz, 298 K,  $\text{D}_2\text{O}$ ) of: (a)  $[\mathbf{1}] = 10 \text{ mM}$ , (b)  $[\mathbf{1}] = [\mathbf{2}] = 10 \text{ mM}$  and (c)  $[\mathbf{2}] = 10 \text{ mM}$ . (d) The 2D NOESY spectrum (500 MHz, 298 K,  $\text{D}_2\text{O}$ ) of  $[\mathbf{1}] = [\mathbf{2}] = 10 \text{ mM}$ .

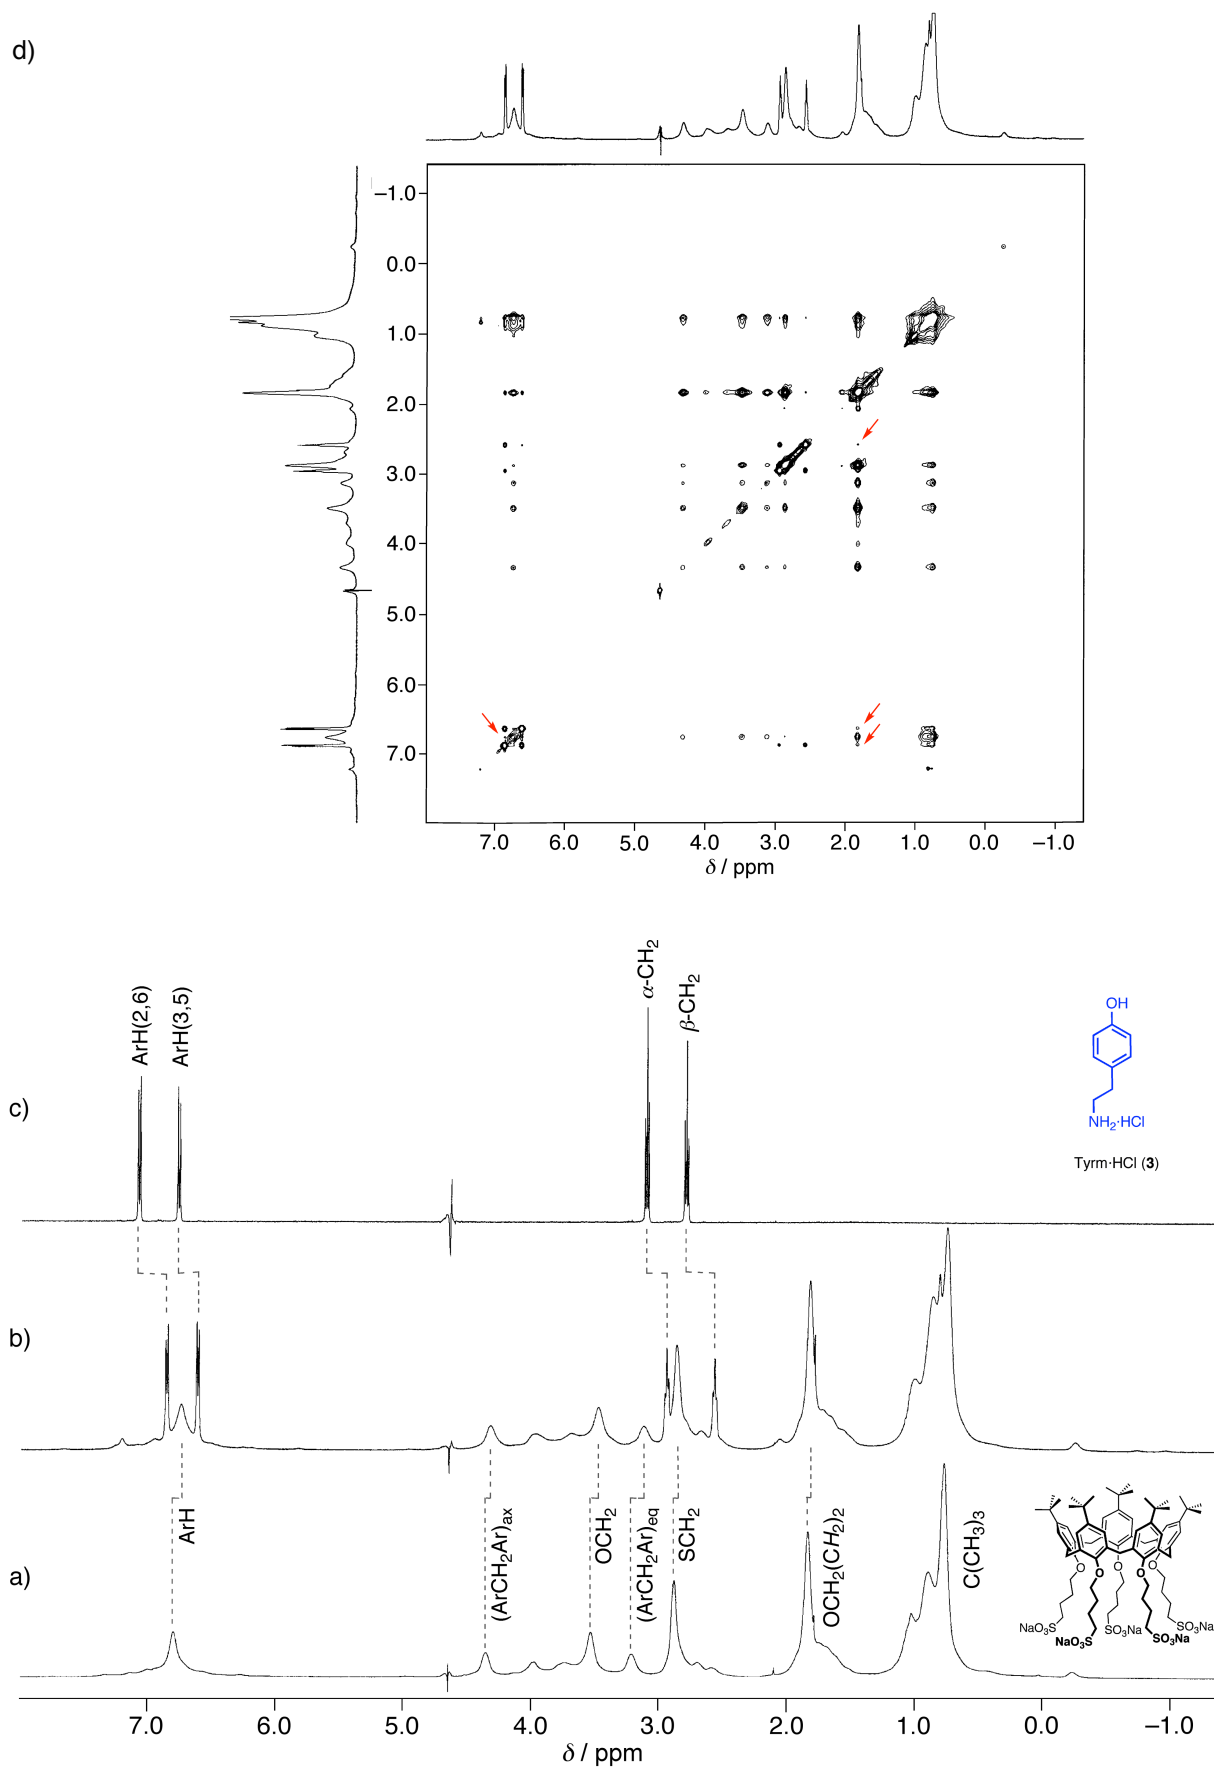

**Figure S3.** <sup>1</sup>H NMR spectra (500 MHz, 298 K, D<sub>2</sub>O) of: (a) [1] = 10 mM, (b) [1] = [3] = 10 mM and (c) [3] = 10 mM. (d) The 2D NOESY spectrum (500 MHz, 298 K, D<sub>2</sub>O) of [1] = [3] = 10 mM.

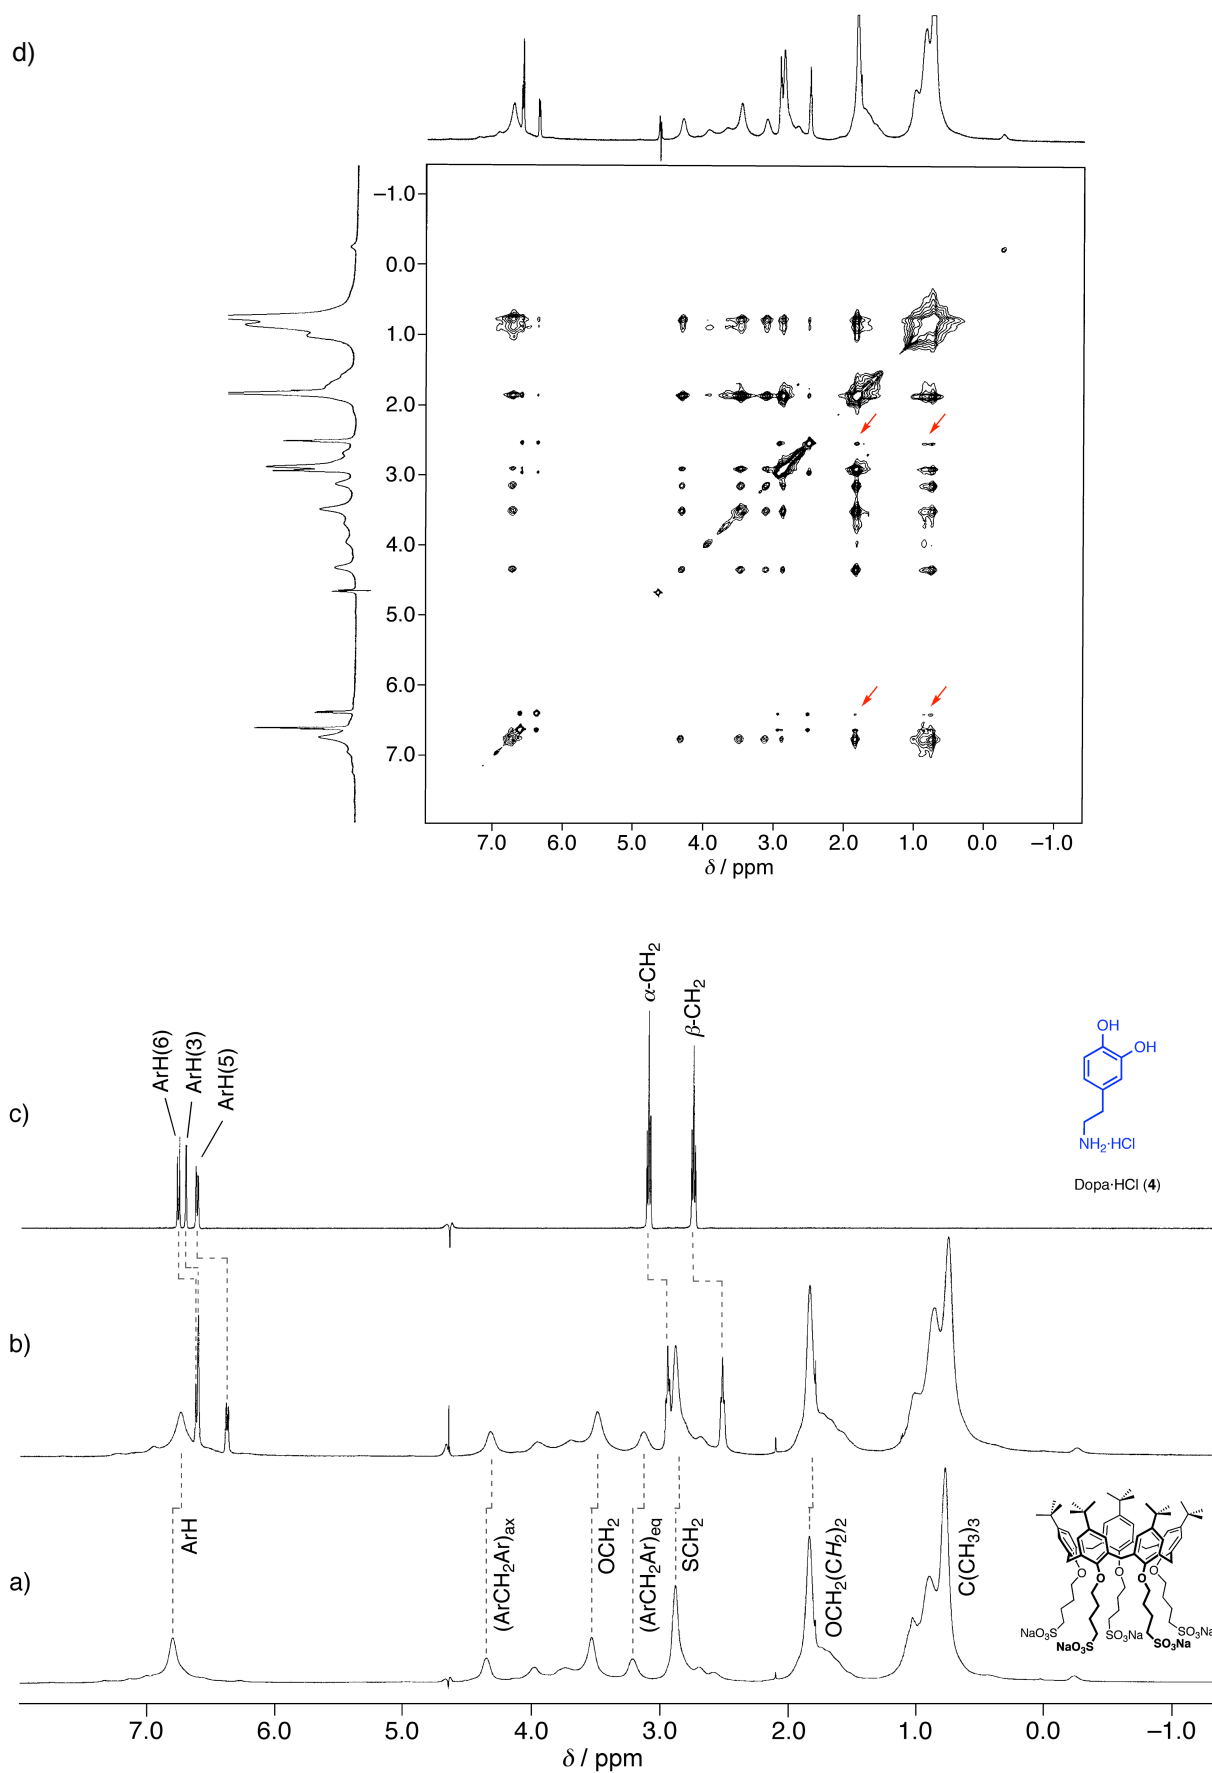

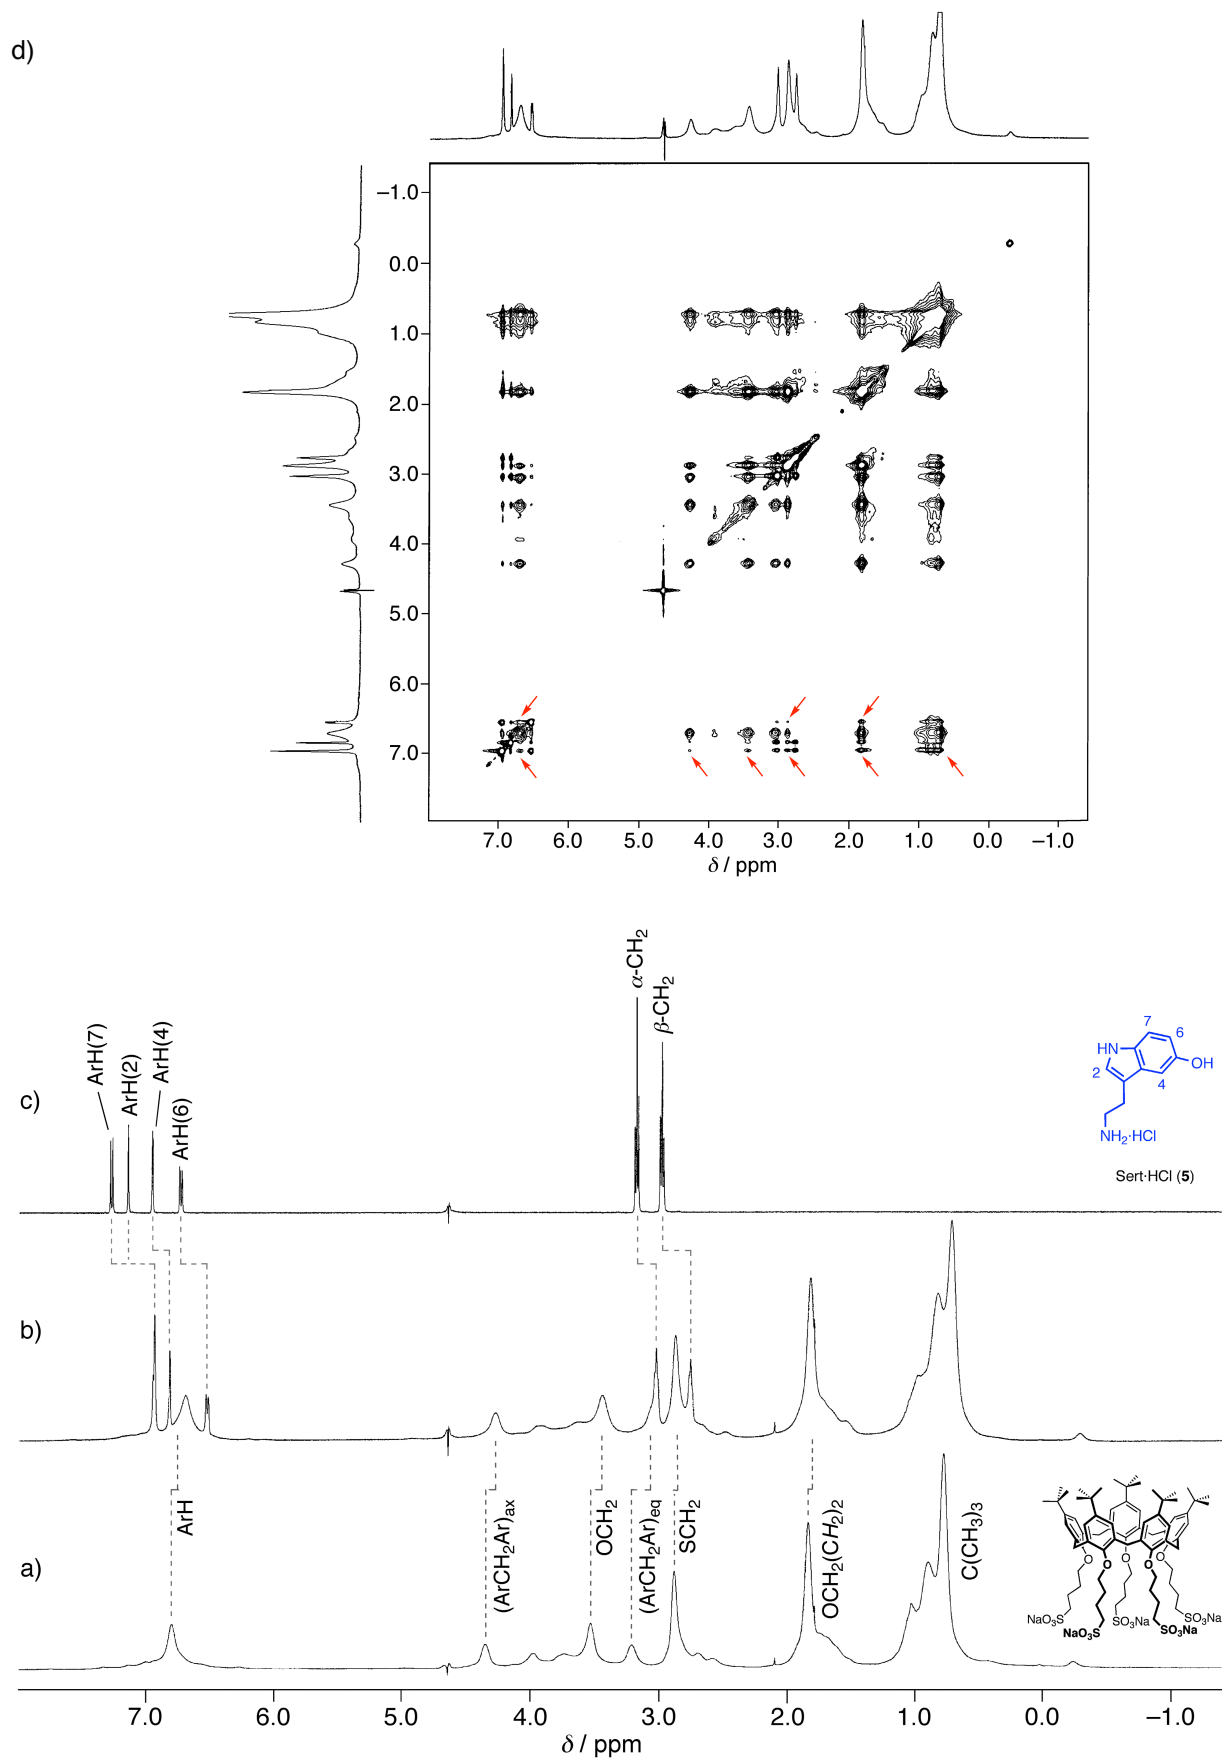

**Figure S5.** <sup>1</sup>H NMR spectra (500 MHz, 298 K, D<sub>2</sub>O) of: (a) [1] = 10 mM, (b) [1] = [5] = 10 mM and (c) [5] = 10 mM. (d) The 2D NOESY spectrum (500 MHz, 298 K, D<sub>2</sub>O) of [1] = [5] = 10 mM.



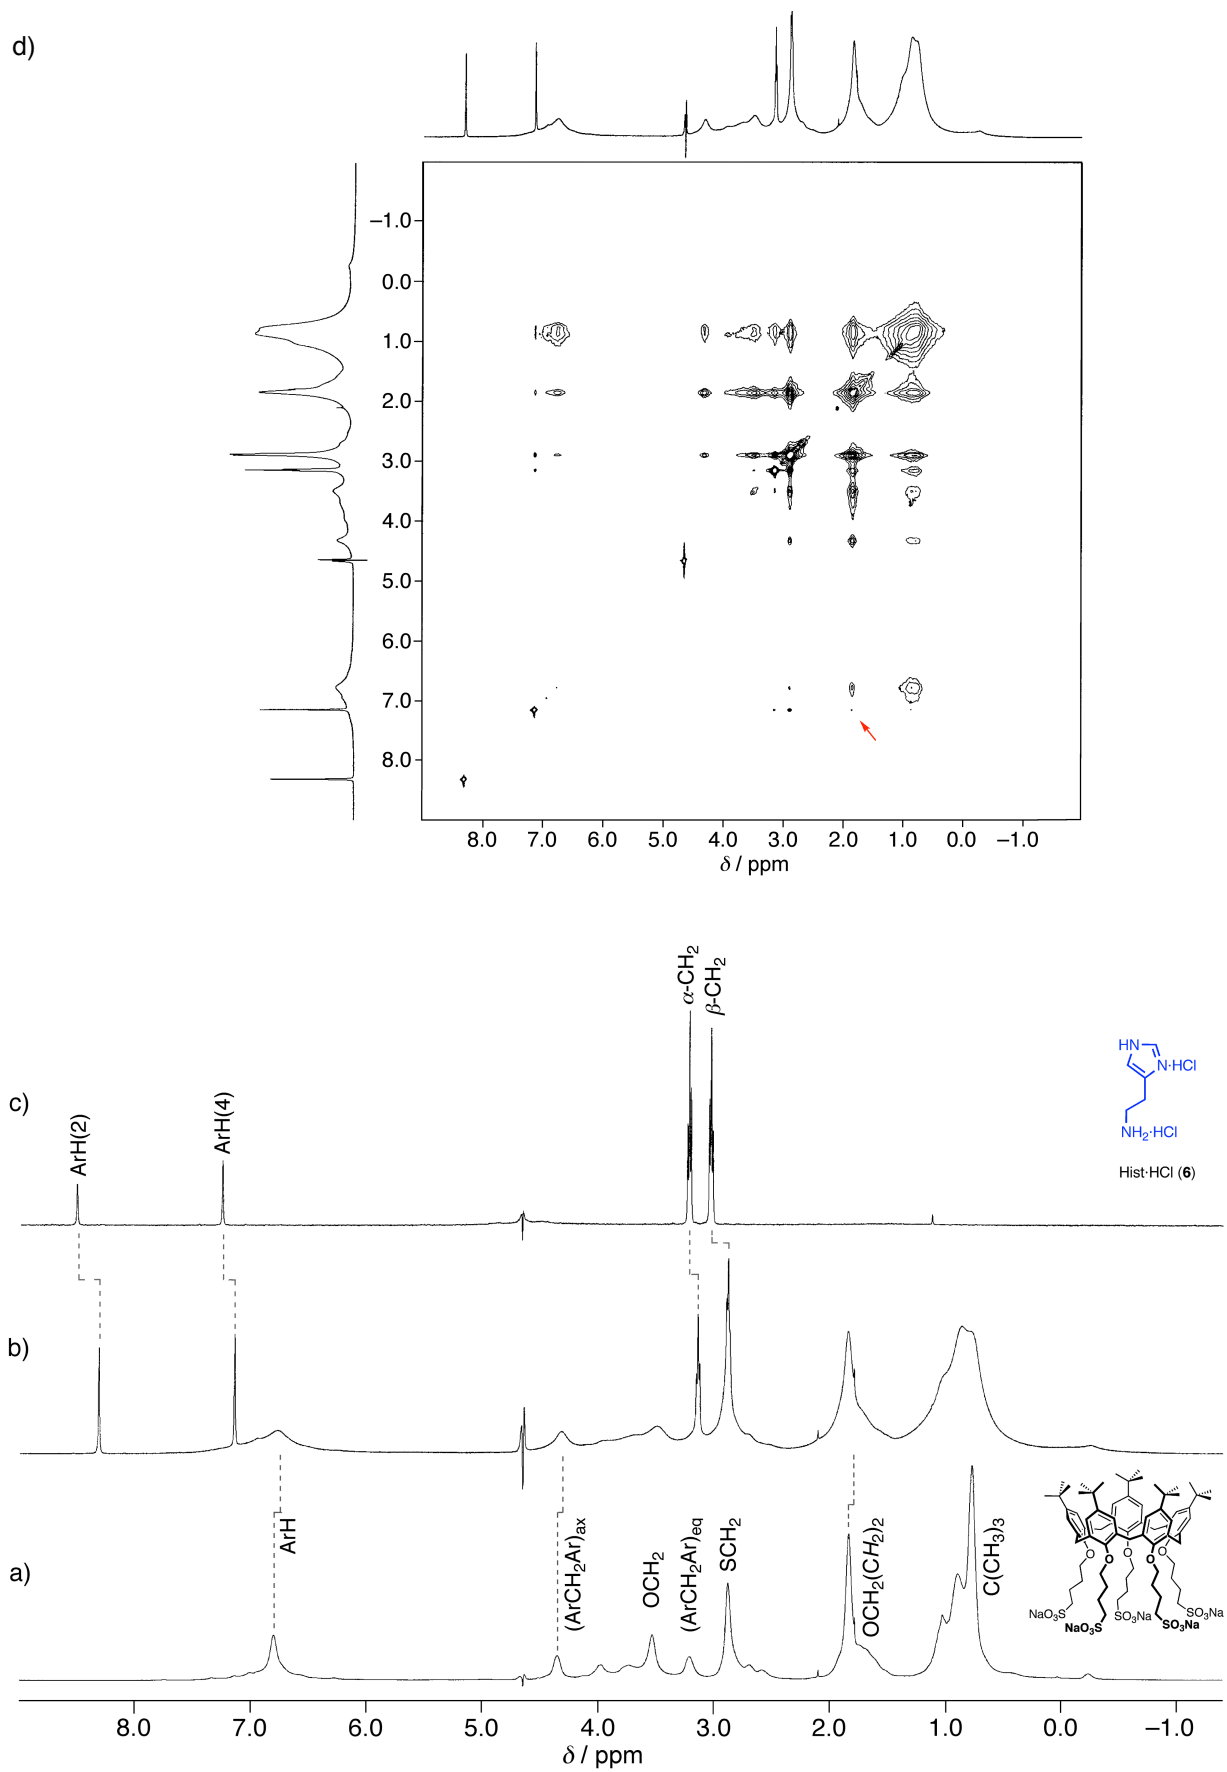

**Figure S6.**  $^1\text{H}$  NMR spectra (500 MHz, 298 K,  $\text{D}_2\text{O}$ ) of: (a)  $[\mathbf{1}] = 10$  mM, (b)  $[\mathbf{1}] = [\mathbf{6}] = 10$  mM and (c)  $[\mathbf{6}] = 10$  mM. (d) The 2D NOESY spectrum (500 MHz, 298 K,  $\text{D}_2\text{O}$ ) of  $[\mathbf{1}] = [\mathbf{6}] = 10$  mM.

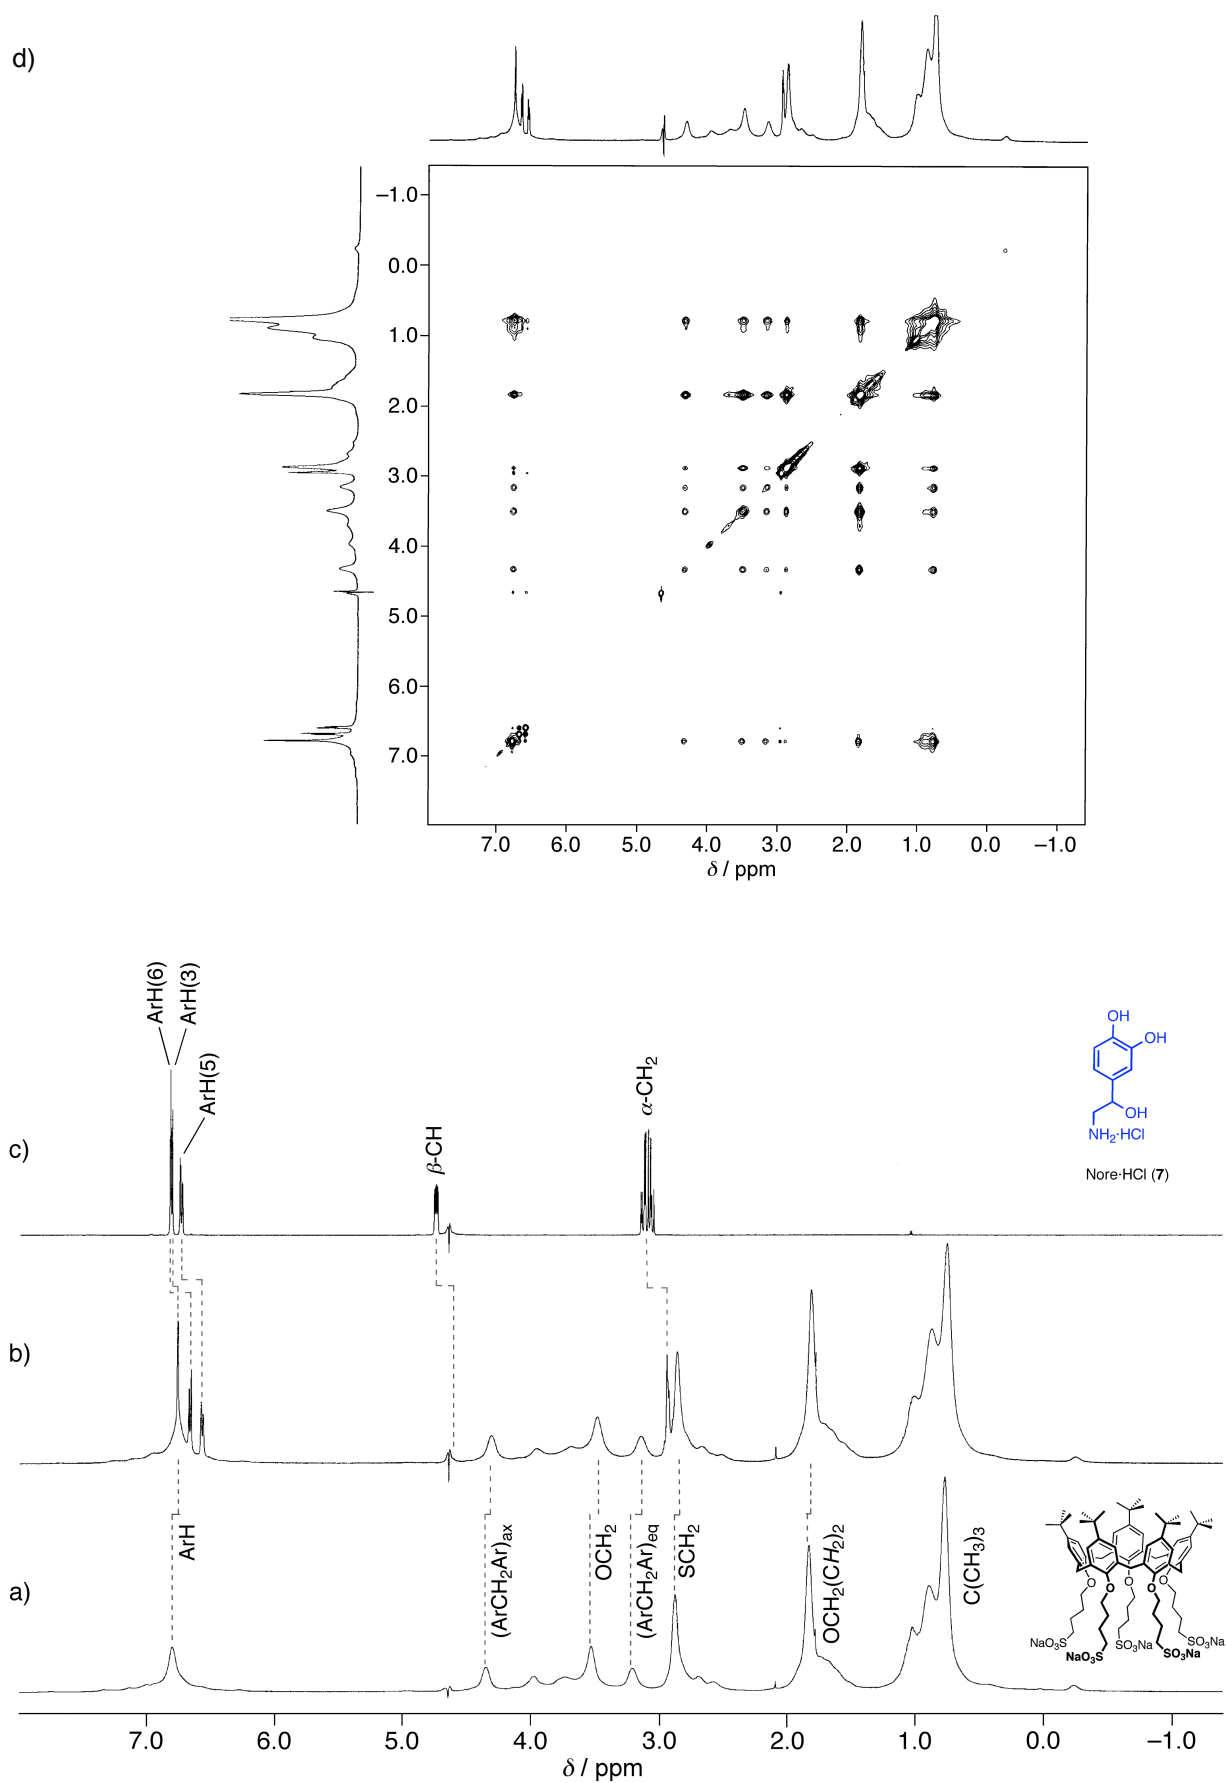

**Figure S7.** <sup>1</sup>H NMR spectra (500 MHz, 298 K, D<sub>2</sub>O) of: (a) [1] = 10 mM, (b) [1] = [7] = 10 mM and (c) [7] = 10 mM. (d) The 2D NOESY spectrum (500 MHz, 298 K, D<sub>2</sub>O) of [1] = [7] = 10 mM.
